# Supplementary material for: Insomnia, Daytime Sleepiness, and Quality of Life among 20,139 College Students in 60 Countries around the World—A 2016–2021 Study
Source: MDPI journal article supplement (doi:10.3390/jcm12020692), 2023-01-15
Supplement: s1 [file s1]

**Table S1.** Comparison of the mean scores of the individual MANSA questions according to insomnia and excessive daytime sleepiness.

| Question                                                                                                      | AIS         |             |           |        | ESS                     |             |           |        |
|---------------------------------------------------------------------------------------------------------------|-------------|-------------|-----------|--------|-------------------------|-------------|-----------|--------|
|                                                                                                               | Insomnia    | No insomnia |           |        | Daytime sleep-<br>iness | Normal      |           |        |
|                                                                                                               | M<br>SD     | M<br>SD     | Cohen's d | p      | M<br>SD                 | M<br>SD     | Cohen's d | p      |
| How satisfied are you with your life as a whole today?                                                        | 4.23 ± 1.36 | 5.00 ± 1.8  | 3.84      | <0.001 | 4.31 ± 1.38             | 4.65 ± 1.32 | 0.25      | <0.001 |
| How satisfied are you with your job (or sheltered employment, or training/education as your main occupation)? | 4.18 ± 1.44 | 4.76 ± 1.26 | 0.43      | <0.001 | 4.21 ± 1.46             | 4.51 ± 1.37 | 0.22      | <0.001 |
| How satisfied are you with your financial situation?                                                          | 3.82 ± 1.60 | 4.39 ± 1.46 | 0.35      | <0.001 | 3.80 ± 1.60             | 4.15 ± 1.55 | 0.22      | <0.001 |
| How satisfied are you with the number and quality of your friendships?                                        | 4.54 ± 1.75 | 4.93 ± 1.63 | 0.23      | <0.001 | 4.56 ± 1.75             | 4.76 ± 1.69 | 0.12      | <0.001 |
| How satisfied are you with your leisure activities (hobby)?                                                   | 3.91 ± 1.66 | 4.54 ± 1.54 | 0.39      | <0.001 | 3.91 ± 1.68             | 4.27 ± 1.62 | 0.22      | <0.001 |
| How satisfied are you with your accommodation?                                                                | 4.60 ± 1.66 | 5.03 ± 1.49 | 0.27      | <0.001 | 4.60 ± 1.66             | 4.85 ± 1.57 | 0.15      | <0.001 |
| How satisfied are you with your personal safety?                                                              | 4.98 ± 1.49 | 5.53 ± 1.27 | 0.40      | <0.001 | 4.99 ± 1.49             | 5.30 ± 1.39 | 0.21      | <0.001 |
| How satisfied are you with the people that you live with?                                                     | 4.88 ± 1.63 | 5.28 ± 1.49 | 0.26      | <0.001 | 4.86 ± 1.64             | 5.12 ± 1.53 | 0.16      | <0.001 |
| How satisfied are you with your sexual life?                                                                  | 3.96 ± 1.96 | 4.46 ± 1.89 | 0.26      | <0.001 | 4.02 ± 1.98             | 4.22 ± 1.93 | 0.10      | <0.001 |
| How satisfied are you with your relationship with your family?                                                | 4.77 ± 1.55 | 5.26 ± 1.33 | 0.34      | <0.001 | 4.80 ± 1.57             | 5.05 ± 1.44 | 0.17      | <0.001 |
| How satisfied are you with your physical health?                                                              | 4.02 ± 1.51 | 4.79 ± 1.36 | 0.54      | <0.001 | 4.02 ± 1.54             | 4.46 ± 1.46 | 0.29      | <0.001 |
| How satisfied are you with your mental health?                                                                | 3.69 ± 1.67 | 4.80 ± 1.52 | 0.70      | <0.001 | 3.74 ± 1.68             | 4.32 ± 1.67 | 0.35      | <0.001 |

M – mean; SD – standard deviation; AIS – Athens Insomnia Scale; ESS – Epworth Sleepiness Scale;
